# Supplementary material
Source: PubMed Central journal article supplement (PMC3376009)
Supplement: NIHMS368599-supplement-Supp_data_S1.pdf [file NIHMS368599-supplement-Supp_data_S1.pdf]

## Data Supplement 1. Initial Set of Candidate Guideline Elements

### Instructions

Please rate all of the survey items on the following Likert scale:

1- Strongly agree; 2- Agree; 3-Don't know/ depends; 4- Disagree; 5- Strongly disagree

---

### Definition of syncope

The following components should be included in the definition of syncope for ED-based studies:

1. Transient loss of consciousness (LOC)
2. Sudden
3. Inability to maintain postural tone
4. Immediate recovery
5. Spontaneous recovery without medical intervention
6. Complete recovery (to pre-existing mental status and neurological function)
7. Due to transient global hypoperfusion

The following patients should be excluded from syncope risk stratification studies:

8. Alcohol or illicit drugs as presumptive cause of LOC
9. Seizure as presumptive cause of LOC
10. Stroke/ transient ischemic attack as presumptive cause of LOC
11. Head trauma followed by LOC
12. Hypoglycemia as presumptive cause of LOC

## **Instructions**

Please rate all of the survey items on the following Likert scale:

1- Strongly agree; 2- Agree; 3-Don't know/ depends; 4- Disagree; 5- Strongly disagree

---

## **Relevant Outcome Time Frame for ED Decision-making**

Prior risk stratification studies have used a wide range of outcome time frames, from the ED encounter itself (e.g. include serious outcomes identified during the ED visits) up to one year after the index ED visit. The questions in this section are designed to identify the clinically relevant outcome time frame for ED decision-making and risk stratification.

An ED-based risk stratification tool should:

13. Identify serious outcomes that are recognized during the ED evaluation\*

\*ED evaluation ends with a disposition decision, e.g. admission, admission but boarding in ED, observation unit, elope/leave against medical advice, or discharge

14. Identify serious outcomes occurring within 7 days after the ED visit

15. Identify serious outcomes occurring between 7 – 30 days after the ED visit

16. Identify serious outcomes occurring between 31-180 days after the ED visit

17. Identify serious outcomes occurring between 181-365 days after the ED visit

## Instructions

Please rate all of the survey items on the following Likert scale:

1- Strongly agree; 2- Agree; 3-Don't know/ depends; 4- Disagree; 5- Strongly disagree

---

## Relevant Outcomes for ED Decision-making

Explicit risk prediction for serious outcomes may improve clinical decision-making. Clinically important serious outcomes that should be predicted by a risk stratification tool include:

### *Mortality*

18. All-cause death
19. Cardiac death
20. Syncope-related death

### *Arrhythmias*

21. Ventricular fibrillation
22. Ventricular tachycardia > 30 seconds
23. Symptomatic\* ventricular tachycardia < 30 seconds
24. Non-symptomatic\* ventricular tachycardia < 30 seconds
25. Symptomatic sinus bradycardia < 60 beats/minute
26. Sinus bradycardia < 40 beats/minute
27. Sick sinus syndrome with alternating sinus bradycardia and tachycardia
28. Sinus pause > 3 seconds
29. Symptomatic Mobitz type I atrioventricular heart block
30. Mobitz type II atrioventricular heart block
31. Complete heart block
32. Junctional / idioventricular rhythm
33. Symptomatic supraventricular tachycardia with rate > 100/minute
34. Symptomatic atrial flutter/fibrillation with ventricular rate >100/min
35. Symptomatic atrial flutter/fibrillation with ventricular rate <60/min
36. Pacemaker or implantable cardioverter-defibrillator malfunction with cardiac pauses

\* Symptomatic refers to concurrent light-headedness/dizziness, syncope/presyncope, or systolic BP < 90 mmHg with arrhythmia. Presyncope is the sensation of imminent loss of consciousness, without actual syncope

## Instructions

Please rate all of the survey items on the following Likert scale:

1- Strongly agree; 2- Agree; 3-Don't know/ depends; 4- Disagree; 5- Strongly disagree

---

## Relevant Outcomes for ED Decision-making

Explicit risk prediction for serious outcomes may improve clinical decision-making. Clinically important serious outcomes that should be predicted by a risk stratification tool include:

### *Electrophysiology Study Findings*

37. Corrected sinus node recovery time > 550 milliseconds
38. His-ventricular intervals >100 milliseconds
39. Inducible ventricular tachycardia for > 30 seconds
40. Inducible polymorphic ventricular tachycardia or ventricular fibrillation in patients with Brugada
41. Inducible polymorphic ventricular tachycardia or ventricular fibrillation in patients with ventricular dysplasia
42. Inducible polymorphic ventricular tachycardia or ventricular fibrillation in patients with previous cardiac arrest
43. Infra-Hisian block

### *Structural Heart Disease*

44. Aortic stenosis with valve area  $\leq 1 \text{ cm}^2$
45. Hypertrophic cardiomyopathy with outflow tract obstruction
46. Hypertrophic cardiomyopathy without outflow tract obstruction
47. Left atrial myxoma or thrombus with outflow tract obstruction
48. Pericardial effusion with effect on ventricular wall motion or pericardial tamponade
49. Pulmonary hypertension with a mean arterial pressure > 30 mmHg
50. Mitral stenosis with valve area  $\leq 2 \text{ cm}^2$
51. Left ventricular ejection fraction <40%

### *Ischemic Heart Disease*

52. Myocardial Infarction

## Instructions

Please rate all of the survey items on the following Likert scale:

1- Strongly agree; 2- Agree; 3-Don't know/ depends; 4- Disagree; 5- Strongly disagree

---

## Relevant Outcomes for ED Decision-making

Explicit risk prediction for serious outcomes may improve clinical decision-making. Clinically important serious outcomes that should be predicted by a risk stratification tool include:

### *Non-cardiac outcomes*

53. Cortical stroke
54. Vertebrobasilar stroke
55. Pulmonary embolus
56. Aortic dissection
57. Internal hemorrhage or anemia requiring transfusion
58. Ectopic pregnancy
59. Abdominal aortic aneurysm
60. Subarachnoid hemorrhage
61. Pneumothorax or pleural effusion
62. Sepsis
63. Syncope resulting in major traumatic injury (trauma that requires admission, or that requires procedural/surgical intervention)

### *Medical/ Procedural Interventions*

64. Permanent pacemaker or defibrillator placement
65. Coronary artery bypass graft or coronary artery stent
66. Cardiac valve surgery
67. Elective cardioversion in the absence of objective evidence that tachyarrhythmia is responsible for the syncope
68. Balloon-pump insertion
69. Heart transplant
70. Initiation of anti-arrhythmia medical therapy
71. Ventricular assist device
72. Endoscopic/ surgical treatment of esophageal varices
73. Endoscopic/ surgical treatment of gastric/ duodenal ulcerations
74. Dialysis for electrolyte abnormalities
75. Use of vasopressors
76. Cardiopulmonary resuscitation
77. Admission to the intensive care unit

### *Health Services Use*

78. Return visit for syncope/fall resulting in admission, but without any of the above events

## Instructions

Please rate all of the survey items on the following Likert scale:

1- Strongly agree; 2- Agree; 3-Don't know/ depends; 4- Disagree; 5- Strongly disagree

---

## ECG Abnormalities

ECG testing is routinely performed in the evaluation of syncope, and ECG abnormalities are strongly predictive of serious outcomes.

### *ECG Abnormalities*

The following ECG findings should be considered abnormal:

- 79. Non-sinus rhythms (includes paced rhythm)
- 80. Frequent PVCs (>3 on standard 10 second tracing)
- 81. Sinus bradycardia  $\leq 40$
- 82. Left ventricular hypertrophy
- 83. Right ventricular hypertrophy
- 84. Left axis deviation
- 85. Right axis deviation
- 86. Complete left bundle branch block
- 87. Complete right bundle branch block
- 88. First degree block (>200 ms)
- 89. Short PR interval (<10 ms)
- 90. Delta waves (e.g. Wolff-Parkinson-White)
- 91. Prolonged QRS (>100 ms)
- 92. Prolonged QTc (>450 ms) - indicate value (ms)
- 93. Brugada pattern
- 94. Q/ST/T changes consistent with acute or chronic ischemia
- 95. Non-specific ST/ T changes

### ECG Interpretation

- 96. Report who is interpreting the ECG (e.g. ED physician, cardiology overread, research team, etc)

## Instructions

Please rate all of the survey items on the following Likert scale:

1- Strongly agree; 2- Agree; 3-Don't know/ depends; 4- Disagree; 5- Strongly disagree

---

## Candidate Predictors

Data on the following elements should be collected and reported:

### *Demographic characteristics*

- 97. Age
- 98. Gender
- 99. Race and ethnicity (self reported)
- 100. Insurance status
- 101. Mode of arrival (self transport, ambulance, transfer from another facility)
- 102. Body mass index

### *Historical features*

- 103. Exertion
- 104. While driving
- 105. While working
- 106. Time of syncope event
- 107. Supine position
- 108. Sitting position
- 109. Lack of warning symptoms
- 110. Chest discomfort
- 111. Shortness of breath
- 112. Palpitations
- 113. Traumatic injury (laceration, fracture, intracranial bleed, thoraco-abdominal visceral injury)
- 114. Vertigo
- 115. Headache
- 116. Incontinence of urine or stool
- 117. Lightheadedness
- 118. Standing from supine/ sitting position
- 119. Post-prandial (within 1 hour of meal)
- 120. Nausea/ vomiting
- 121. Abdominal pain
- 122. Feeling of warmth
- 123. Feeling of cold
- 124. Diaphoresis
- 125. Cyanosis noted by bystander
- 126. Blurred vision
- 127. Any prodromes lasting greater than 5 seconds
- 128. Triggered by painful/ emotionally distressing stimulus
- 129. Triggered by turning head/ cough/ micturation/ defecation
- 130. Recent history of diarrhea
- 131. Recent history of decreased oral intake

## Instructions

Please rate all of the survey items on the following Likert scale:

1- Strongly agree; 2- Agree; 3-Don't know/ depends; 4- Disagree; 5- Strongly disagree

---

## Candidate Predictors

Data on the following elements should be collected and reported:

### *Co-morbidities*

132. Premature (<50 years) sudden death in sibling or parents
133. Congestive heart failure
134. Coronary artery disease (past MI/ PTCA/ CABG)
135. Peripheral vascular disease
136. Stroke / TIA
137. Congenital heart disease
138. Structural heart disease- aortic stenosis
139. Structural heart disease- outflow tract disease, excluding aortic stenosis (e.g. idiopathic hypertrophic subaortic stenosis)
140. Structural heart disease- ejection fraction <40% by objective testing (e.g. echocardiogram, cardiac catheterization) within one year
141. Structural heart disease- pulmonary hypertension
142. Structural heart disease- cardiac valve disease, excluding aortic stenosis and mitral prolapse
143. Arrhythmia- ventricular tachycardia/ ventricular fibrillation/ sudden death
144. Arrhythmia- SVTs, including PSVT, atrial fibrillation, atrial flutter
145. Arrhythmia- sick sinus syndrome, Mobitz II heart block, complete heart block, junctional rhythm
146. Implanted permanent pacemaker
147. Implanted defibrillator
148. Diabetes requiring medication
149. Hypertension requiring medication
150. Renal insufficiency (creatinine >2 mg/dL in the ED)
151. Syncope in the prior year
152. First syncope episode prior to age 35
153. Prior gastrointestinal bleeding

### *Medications*

154. Diuretics
155. Digoxin
156. Alpha-blocker (e.g. tamsulosin, terazosin)
157. Beta-blocker
158. Calcium channel blockers
159. Nitrates
160. Other antiarrhythmics not listed above (e.g. amiodarone, sotalol)



## Instructions

Please rate all of the survey items on the following Likert scale:

1- Strongly agree; 2- Agree; 3-Don't know/ depends; 4- Disagree; 5- Strongly disagree

---

## Candidate Predictors

Data on the following elements should be collected and reported:

### *Physical examination findings*

- 161. Triage systolic blood pressure
- 162. Highest systolic blood pressure measured in ED
- 163. Lowest systolic blood pressure measured in ED
- 164. Triage pulse
- 165. Highest pulse measured in ED
- 166. Lowest pulse measured in ED
- 167. Orthostatic vital signs (blood pressure and pulse measured lying and measured standing)
- 168. Pulse oximetry on room air
- 169. Heart murmur
- 170. S3 or S4 gallop
- 171. Carotid bruit
- 172. New neurologic deficits
- 173. Fecal occult blood
- 174. Dry mucous membranes

### *Laboratory tests*

- 175. Blood urea nitrogen
- 176. Creatinine
- 177. Calculated creatinine clearance using Cockcroft-Gault formula:  $CrCl$  (mL/min) =  $[(140 - \text{age}) \times \text{weight (kg)}] / 72 \times \text{serum creatinine (mg/dL)} (\times 0.85 \text{ for women})$
- 178. Glucose
- 179. Hematocrit
- 180. Hemoglobin
- 181. Initial troponin
- 182. Serial troponin at least 4 hours after initial troponin
- 183. Natriuretic peptide (BNP or NT-proBNP)
- 184. Pregnancy test
