# Supplementary material
Source: PubMed Central journal article supplement (PMC3376009)
Supplement: NIHMS368599-supplement-Supp_data_S2.pdf [file NIHMS368599-supplement-Supp_data_S2.pdf]

**Data Supplement S2. Example of Summaries of Group and Individual Responses to First Survey Round**

**Definition of Syncope (Q1-Q12)**

1- Strongly agree; 2- Agree; 3-Don't know/ depends; 4- Disagree; 5- Strongly disagree

Your individual response is in **RED**.

Items achieving >80% consensus (Rating=1,2) are in **BOLD**

Items achieving 70-80% consensus (Rating=1,2) are in *ITALICS*

The following components should be included in the definition of syncope for ED-based studies:

**Q1. Transient loss of consciousness**

|         |          |   |      |   |   |
|---------|----------|---|------|---|---|
| Rating  | <b>1</b> | 2 | 3    | 4 | 5 |
| %       | 92       | 8 |      |   |   |
| Median: | 1        |   | IQR: | 0 |   |

**Q2. Sudden**

|         |          |    |      |    |   |
|---------|----------|----|------|----|---|
| Rating  | <b>1</b> | 2  | 3    | 4  | 5 |
| %       | 46       | 21 | 17   | 17 |   |
| Median: | 2        |    | IQR: | 2  |   |

**Q3. Inability to maintain postural tone**

|         |          |    |      |   |   |
|---------|----------|----|------|---|---|
| Rating  | <b>1</b> | 2  | 3    | 4 | 5 |
| %       | 46       | 38 | 8    | 4 | 4 |
| Median: | 2        |    | IQR: | 1 |   |

**Q4. Immediate recovery**

|         |    |          |      |    |   |
|---------|----|----------|------|----|---|
| Rating  | 1  | <b>2</b> | 3    | 4  | 5 |
| %       | 46 | 21       | 13   | 21 |   |
| Median: | 2  |          | IQR: | 2  |   |

**Q5. Spontaneous recovery without medical intervention**

|         |          |    |      |   |   |
|---------|----------|----|------|---|---|
| Rating  | <b>1</b> | 2  | 3    | 4 | 5 |
| %       | 75       | 21 |      | 4 |   |
| Median: | 1        |    | IQR: | 3 |   |

**Q6. Complete recovery (to pre-existing mental status and neurological function)**

|         |     |    |      |   |   |
|---------|-----|----|------|---|---|
| Rating  | 1   | 2  | 3    | 4 | 5 |
| %       | 50  | 38 | 4    | 8 |   |
| Median: | 1.5 |    | IQR: |   | 1 |

Q7. Due to transient global hypoperfusion

|         |    |    |      |    |   |
|---------|----|----|------|----|---|
| Rating  | 1  | 2  | 3    | 4  | 5 |
| %       | 46 | 17 | 25   | 13 |   |
| Median: | 2  |    | IQR: |    | 2 |

The following patients should be excluded from syncope risk stratification studies:

**Q8. Alcohol or illicit drugs as presumptive cause of LOC**

|         |    |   |      |   |   |
|---------|----|---|------|---|---|
| Rating  | 1  | 2 | 3    | 4 | 5 |
| %       | 80 | 8 |      | 8 |   |
| Median: | 1  |   | IQR: |   | 0 |

**Q9. Seizure as presumptive cause of LOC**

|         |    |    |      |    |   |
|---------|----|----|------|----|---|
| Rating  | 1  | 2  | 3    | 4  | 5 |
| %       | 63 | 17 | 8    | 13 |   |
| Median: | 1  |    | IQR: |    | 1 |

**Q10. Stroke/ transient ischemic attack as presumptive cause of LOC**

|         |    |    |      |   |     |
|---------|----|----|------|---|-----|
| Rating  | 1  | 2  | 3    | 4 | 5   |
| %       | 75 | 17 | 8    |   |     |
| Median: | 1  |    | IQR: |   | 0.5 |

Q11. Head trauma followed by LOC

|         |    |   |      |    |     |
|---------|----|---|------|----|-----|
| Rating  | 1  | 2 | 3    | 4  | 5   |
| %       | 75 | 4 | 8    | 13 |     |
| Median: | 1  |   | IQR: |    | 0.5 |

**Q12. Hypoglycemia as presumptive cause of LOC**

|         |    |    |      |   |     |
|---------|----|----|------|---|-----|
| Rating  | 1  | 2  | 3    | 4 | 5   |
| %       | 75 | 13 | 8    | 4 |     |
| Median: | 1  |    | IQR: |   | 0.5 |

**Relevant Outcome Timeframe for ED Decision-Making (Q13-Q17)**

1- Strongly agree; 2- Agree; 3-Don't know/ depends; 4- Disagree; 5- Strongly disagree

Your individual response is in **RED**.

Items achieving >80% consensus (Rating=1,2) are in **BOLD**

Items achieving 70-80% consensus (Rating=1,2) are in *ITALICS*

An ED-based risk stratification tool should:

*Q13. Identify serious outcomes that are recognized during the ED evaluation*

|         |    |    |      |          |
|---------|----|----|------|----------|
| Rating  | 1  | 2  | 3    | <b>4</b> |
| %       | 65 | 13 | 13   | 9        |
| Median: | 1  |    | IQR: | 1        |

**Q14. Identify serious outcomes occurring within 7 days after the ED visit**

|         |          |    |      |   |
|---------|----------|----|------|---|
| Rating  | <b>1</b> | 2  | 3    | 4 |
| %       | 61       | 30 | 9    |   |
| Median: | 1        |    | IQR: | 1 |

**Q15. Identify serious outcomes occurring between 7–30 days after the ED visit**

|         |          |    |      |   |
|---------|----------|----|------|---|
| Rating  | <b>1</b> | 2  | 3    | 4 |
| %       | 42       | 46 | 13   |   |
| Median: | 2        |    | IQR: | 1 |

Q16. Identify serious outcomes occurring between 31-180 days after the ED visit

|         |   |    |      |          |
|---------|---|----|------|----------|
| Rating  | 1 | 2  | 3    | <b>4</b> |
| %       | 4 | 22 | 35   | 39       |
| Median: | 3 |    | IQR: | 2        |

Q17. Identify serious outcomes occurring between 181-365 days after the ED visit

|         |   |    |      |          |
|---------|---|----|------|----------|
| Rating  | 1 | 2  | 3    | <b>4</b> |
| %       | 4 | 22 | 17   | 48       |
| Median: | 4 |    | IQR: | 2        |

**Relevant Outcomes for ED Decision-making (Q18-Q35)**

1- Strongly agree; 2- Agree; 3-Don't know/ depends; 4- Disagree; 5- Strongly disagree  
 Your individual response is in RED.

Items achieving >80% consensus (Rating=1,2) are in **BOLD**

Items achieving 70-80% consensus (Rating=1,2) are in *ITALICS*

Explicit risk prediction for serious outcomes may improve clinical decision-making. Clinically important serious outcomes that should be predicted by a risk stratification tool include:

Mortality:

*Q18. All-cause death*

|         |          |    |      |   |   |
|---------|----------|----|------|---|---|
| Rating  | <b>1</b> | 2  | 3    | 4 | 5 |
| %       | 46       | 25 | 13   | 8 | 8 |
| Median: | 2        |    | IQR: |   | 2 |

**Q19. Cardiac death**

|         |          |    |      |   |   |
|---------|----------|----|------|---|---|
| Rating  | <b>1</b> | 2  | 3    | 4 | 5 |
| %       | 63       | 38 |      |   |   |
| Median: | 1        |    | IQR: |   | 1 |

**Q20. Syncope-related death**

|         |          |    |      |   |   |
|---------|----------|----|------|---|---|
| Rating  | <b>1</b> | 2  | 3    | 4 | 5 |
| %       | 46       | 38 | 8    | 8 |   |
| Median: | 2        |    | IQR: |   | 1 |

Arrhythmias:

**Q21. Ventricular fibrillation**

|         |          |    |      |   |   |
|---------|----------|----|------|---|---|
| Rating  | <b>1</b> | 2  | 3    | 4 | 5 |
| %       | 83       | 13 | 4    |   |   |
| Median: | 1        |    | IQR: |   | 0 |

**Q22. Ventricular tachycardia > 30 seconds**

|         |          |    |      |   |   |
|---------|----------|----|------|---|---|
| Rating  | <b>1</b> | 2  | 3    | 4 | 5 |
| %       | 71       | 25 | 4    |   |   |
| Median: | 1        |    | IQR: |   | 1 |

**Q23. Symptomatic ventricular tachycardia < 30 seconds**

|         |    |    |      |   |   |
|---------|----|----|------|---|---|
| Rating  | 1  | 2  | 3    | 4 | 5 |
| %       | 67 | 21 | 13   |   |   |
| Median: | 1  |    | IQR: |   | 1 |

**Q24. Non-symptomatic ventricular tachycardia < 30 seconds**

|         |    |    |      |   |   |
|---------|----|----|------|---|---|
| Rating  | 1  | 2  | 3    | 4 | 5 |
| %       | 30 | 22 | 43   | 4 |   |
| Median: | 2  |    | IQR: |   | 2 |

**Q25. Symptomatic sinus bradycardia < 60 beats/minute**

|         |    |    |      |   |   |
|---------|----|----|------|---|---|
| Rating  | 1  | 2  | 3    | 4 | 5 |
| %       | 29 | 25 | 38   | 8 |   |
| Median: | 2  |    | IQR: |   | 2 |

**Q26. Sinus bradycardia < 40 beats/minute**

|         |    |    |      |   |   |
|---------|----|----|------|---|---|
| Rating  | 1  | 2  | 3    | 4 | 5 |
| %       | 39 | 26 | 26   | 9 |   |
| Median: | 2  |    | IQR: |   | 2 |

**Q27. Sick sinus syndrome with alternating sinus bradycardia and tachycardia**

|         |    |    |      |    |   |
|---------|----|----|------|----|---|
| Rating  | 1  | 2  | 3    | 4  | 5 |
| %       | 39 | 35 | 13   | 13 |   |
| Median: | 2  |    | IQR: |    | 2 |

**Q28. Sinus pause > 3 seconds**

|         |    |    |      |   |   |
|---------|----|----|------|---|---|
| Rating  | 1  | 2  | 3    | 4 | 5 |
| %       | 45 | 14 | 32   | 9 |   |
| Median: | 2  |    | IQR: |   | 2 |

**Q29. Symptomatic Mobitz type I atrioventricular heart block**

|         |    |    |      |    |     |
|---------|----|----|------|----|-----|
| Rating  | 1  | 2  | 3    | 4  | 5   |
| %       | 25 | 33 | 25   | 13 | 4   |
| Median: | 2  |    | IQR: |    | 1.5 |

**Q30. Mobitz type II atrioventricular heart block**

|         |    |    |      |   |   |
|---------|----|----|------|---|---|
| Rating  | 1  | 2  | 3    | 4 | 5 |
| %       | 61 | 22 | 9    | 9 |   |
| Median: | 1  |    | IQR: |   | 1 |

**Q31. Complete heart block**

|         |    |    |      |   |   |
|---------|----|----|------|---|---|
| Rating  | 1  | 2  | 3    | 4 | 5 |
| %       | 71 | 17 | 4    | 8 |   |
| Median: | 1  |    | IQR: |   | 1 |

**Q32. Junctional/idioventricular rhythm**

|         |    |    |      |    |   |
|---------|----|----|------|----|---|
| Rating  | 1  | 2  | 3    | 4  | 5 |
| %       | 43 | 22 | 22   | 13 |   |
| Median: | 2  |    | IQR: |    | 2 |

**Q33. Symptomatic supraventricular tachycardia with ventricular rate > 100/minute**

|         |    |    |      |    |   |
|---------|----|----|------|----|---|
| Rating  | 1  | 2  | 3    | 4  | 5 |
| %       | 26 | 30 | 30   | 13 |   |
| Median: | 2  |    | IQR: |    | 2 |

**Q34. Symptomatic atrial flutter/fibrillation with ventricular rate <60/min**

|         |    |    |      |    |   |
|---------|----|----|------|----|---|
| Rating  | 1  | 2  | 3    | 4  | 5 |
| %       | 29 | 38 | 21   | 13 |   |
| Median: | 2  |    | IQR: |    | 2 |

**Q35. Pacemaker or implantable cardioverter-defibrillator malfunction with cardiac pauses. Symptomatic atrial flutter/fibrillation with ventricular rate <60/min**

|         |    |   |      |   |   |
|---------|----|---|------|---|---|
| Rating  | 1  | 2 | 3    | 4 | 5 |
| %       | 68 | 9 | 18   | 5 |   |
| Median: | 1  |   | IQR: |   | 1 |

**Relevant Outcomes for ED Decision-making (Q36-Q51)**

1- Strongly agree; 2- Agree; 3-Don't know/ depends; 4- Disagree; 5- Strongly disagree  
 Your individual response is in RED.

Items achieving >80% consensus (Rating=1,2) are in **BOLD**

Items achieving 70-80% consensus (Rating=1,2) are in *ITALICS*

Explicit risk prediction for serious outcomes may improve clinical decision-making. Clinically important serious outcomes that should be predicted by a risk stratification tool include:

Electrophysiology Study Findings:

Q36. Corrected sinus node recovery time > 550 milliseconds

|         |    |   |        |    |   |
|---------|----|---|--------|----|---|
| Rating  | 1  | 2 | 3      | 4  | 5 |
| %       | 21 | 8 | 50     | 17 | 4 |
| Median: | 3  |   | IQR: 1 |    |   |

Q37. His-Ventricular intervals >100 milliseconds

|         |    |    |          |   |   |
|---------|----|----|----------|---|---|
| Rating  | 1  | 2  | 3        | 4 | 5 |
| %       | 25 | 13 | 50       | 8 | 4 |
| Median: | 3  |    | IQR: 1.5 |   |   |

Q38. Inducible ventricular tachycardia for > 30 seconds

|         |    |    |          |    |   |
|---------|----|----|----------|----|---|
| Rating  | 1  | 2  | 3        | 4  | 5 |
| %       | 25 | 21 | 42       | 13 |   |
| Median: | 3  |    | IQR: 1.5 |    |   |

Q39. Inducible polymorphic ventricular tachycardia or ventricular fibrillation in patients with Brugada

|         |    |    |          |    |   |
|---------|----|----|----------|----|---|
| Rating  | 1  | 2  | 3        | 4  | 5 |
| %       | 25 | 29 | 29       | 17 |   |
| Median: | 2  |    | IQR: 1.5 |    |   |

Q40. Inducible polymorphic ventricular tachycardia or ventricular fibrillation in patients with ventricular dysplasia

|         |    |    |        |   |   |
|---------|----|----|--------|---|---|
| Rating  | 1  | 2  | 3      | 4 | 5 |
| %       | 29 | 25 | 38     | 8 |   |
| Median: | 2  |    | IQR: 2 |   |   |

Q41. Inducible polymorphic ventricular tachycardia or ventricular fibrillation in patients with previous cardiac arrest

|         |    |    |      |   |   |
|---------|----|----|------|---|---|
| Rating  | 1  | 2  | 3    | 4 | 5 |
| %       | 33 | 33 | 25   | 8 |   |
| Median: | 2  |    | IQR: |   | 2 |

Q42. Infra-Hisian block

|         |    |    |      |    |   |
|---------|----|----|------|----|---|
| Rating  | 1  | 2  | 3    | 4  | 5 |
| %       | 29 | 17 | 42   | 13 |   |
| Median: | 3  |    | IQR: |    | 2 |

Structural Heart Disease:

Q43. Aortic stenosis with valve area  $\leq 1 \text{ cm}^2$

|         |    |    |      |    |   |
|---------|----|----|------|----|---|
| Rating  | 1  | 2  | 3    | 4  | 5 |
| %       | 54 | 17 | 13   | 17 |   |
| Median: | 1  |    | IQR: |    | 2 |

Q44. Hypertrophic cardiomyopathy with outflow tract obstruction

|         |     |    |      |    |     |
|---------|-----|----|------|----|-----|
| Rating  | 1   | 2  | 3    | 4  | 5   |
| %       | 50  | 25 | 8    | 17 |     |
| Median: | 1.5 |    | IQR: |    | 1.5 |

Q45. Hypertrophic cardiomyopathy without outflow tract obstruction

|         |   |    |      |    |   |
|---------|---|----|------|----|---|
| Rating  | 1 | 2  | 3    | 4  | 5 |
| %       | 9 | 17 | 57   | 17 |   |
| Median: | 3 |    | IQR: |    | 1 |

Q46. Left atrial myxoma or thrombus with outflow tract obstruction

|         |    |    |      |    |   |
|---------|----|----|------|----|---|
| Rating  | 1  | 2  | 3    | 4  | 5 |
| %       | 42 | 42 | 4    | 13 |   |
| Median: | 2  |    | IQR: |    | 1 |



*Q47. Pericardial effusion with effect on ventricular wall motion or pericardial tamponade*

|         |    |    |      |    |   |
|---------|----|----|------|----|---|
| Rating  | 1  | 2  | 3    | 4  | 5 |
| %       | 38 | 33 | 17   | 13 |   |
| Median: | 2  |    | IQR: |    | 2 |

Q48. Pulmonary hypertension with a mean arterial pressure > 30 mmHg

|         |    |    |      |    |   |
|---------|----|----|------|----|---|
| Rating  | 1  | 2  | 3    | 4  | 5 |
| %       | 13 | 29 | 42   | 17 |   |
| Median: | 3  |    | IQR: |    | 1 |

Q49. Mitral stenosis with valve area  $\leq 2$  cm<sup>2</sup>

|         |     |    |      |    |     |
|---------|-----|----|------|----|-----|
| Rating  | 1   | 2  | 3    | 4  | 5   |
| %       | 25  | 25 | 33   | 17 |     |
| Median: | 2.5 |    | IQR: |    | 1.5 |

50. Left ventricular ejection fraction <40%

|         |    |    |      |    |   |
|---------|----|----|------|----|---|
| Rating  | 1  | 2  | 3    | 4  | 5 |
| %       | 13 | 33 | 38   | 17 |   |
| Median: | 3  |    | IQR: |    | 1 |

Ischemic Heart Disease:

**Q51. Myocardial Infarction**

|         |    |    |      |    |   |
|---------|----|----|------|----|---|
| Rating  | 1  | 2  | 3    | 4  | 5 |
| %       | 54 | 29 | 4    | 13 |   |
| Median: | 1  |    | IQR: |    | 1 |

**Relevant Outcomes for ED Decision-making (Q52-Q77)**

1- Strongly agree; 2- Agree; 3-Don't know/ depends; 4- Disagree; 5- Strongly disagree  
Your individual response is in RED.

Items achieving >80% consensus (Rating=1,2) are in **BOLD**

Items achieving 70-80% consensus (Rating=1,2) are in *ITALICS*

Explicit risk prediction for serious outcomes may improve clinical decision-making. Clinically important serious outcomes that should be predicted by a risk stratification tool include:

Non-cardiac outcomes:

**Q52. Cortical stroke**

|         |   |   |        |    |    |
|---------|---|---|--------|----|----|
| Rating  | 1 | 2 | 3      | 4  | 5  |
| %       | 4 | 9 | 35     | 39 | 13 |
| Median: | 4 |   | IQR: 1 |    |    |

**Q53. Vertebrobasilar stroke**

|         |   |    |        |    |   |
|---------|---|----|--------|----|---|
| Rating  | 1 | 2  | 3      | 4  | 5 |
| %       | 4 | 39 | 26     | 22 | 9 |
| Median: | 3 |    | IQR: 2 |    |   |

**Q54. Pulmonary embolus**

|         |    |    |        |   |   |
|---------|----|----|--------|---|---|
| Rating  | 1  | 2  | 3      | 4 | 5 |
| %       | 52 | 39 | 4      | 4 |   |
| Median: | 1  |    | IQR: 1 |   |   |

**Q55. Aortic dissection**

|         |    |    |        |   |   |
|---------|----|----|--------|---|---|
| Rating  | 1  | 2  | 3      | 4 | 5 |
| %       | 57 | 30 | 4      | 4 | 4 |
| Median: | 1  |    | IQR: 1 |   |   |

**Q56. Internal hemorrhage or anemia requiring transfusion**

|         |    |    |        |   |   |
|---------|----|----|--------|---|---|
| Rating  | 1  | 2  | 3      | 4 | 5 |
| %       | 39 | 48 | 4      | 4 | 4 |
| Median: | 2  |    | IQR: 1 |   |   |

Q57. Ectopic pregnancy

|         |    |    |      |   |   |
|---------|----|----|------|---|---|
| Rating  | 1  | 2  | 3    | 4 | 5 |
| %       | 13 | 39 | 35   | 9 | 4 |
| Median: | 2  |    | IQR: |   | 1 |

Q58. Abdominal aortic aneurysm

|         |    |    |      |   |   |
|---------|----|----|------|---|---|
| Rating  | 1  | 2  | 3    | 4 | 5 |
| %       | 22 | 43 | 22   | 4 | 9 |
| Median: | 2  |    | IQR: |   | 1 |

Q59. Subarachnoid hemorrhage

|         |    |    |      |   |   |
|---------|----|----|------|---|---|
| Rating  | 1  | 2  | 3    | 4 | 5 |
| %       | 30 | 43 | 13   | 4 | 9 |
| Median: | 2  |    | IQR: |   | 2 |

Q60. Pneumothorax or pleural effusion

|         |   |    |      |    |   |
|---------|---|----|------|----|---|
| Rating  | 1 | 2  | 3    | 4  | 5 |
| %       | 9 | 36 | 32   | 14 | 9 |
| Median: | 3 |    | IQR: |    | 1 |

Q61. Sepsis

|         |   |    |      |   |    |
|---------|---|----|------|---|----|
| Rating  | 1 | 2  | 3    | 4 | 5  |
| %       | 9 | 35 | 30   | 9 | 17 |
| Median: | 3 |    | IQR: |   | 2  |

**Q62. Recurrent syncope or fall resulting in major traumatic injury (trauma that requires admission, or that requires procedural/surgical intervention)**

|         |    |    |      |   |   |
|---------|----|----|------|---|---|
| Rating  | 1  | 2  | 3    | 4 | 5 |
| %       | 33 | 48 | 14   | 5 |   |
| Median: | 2  |    | IQR: |   | 1 |

Medical/ Procedural Interventions:

**Q63. Permanent pacemaker or defibrillator placement**

|         |    |    |        |   |   |
|---------|----|----|--------|---|---|
| Rating  | 1  | 2  | 3      | 4 | 5 |
| %       | 70 | 26 | 4      |   |   |
| Median: | 1  |    | IQR: 1 |   |   |

*Q64. Coronary artery bypass graft or coronary artery stent*

|         |    |    |        |   |   |
|---------|----|----|--------|---|---|
| Rating  | 1  | 2  | 3      | 4 | 5 |
| %       | 35 | 39 | 17     | 9 |   |
| Median: | 2  |    | IQR: 2 |   |   |

*Q65. Cardiac valve surgery*

|         |     |    |        |   |   |
|---------|-----|----|--------|---|---|
| Rating  | 1   | 2  | 3      | 4 | 5 |
| %       | 50  | 27 | 14     | 9 |   |
| Median: | 1.5 |    | IQR: 1 |   |   |

Q66. Elective cardioversion in the absence of objective evidence that tachyarrhythmia is responsible for the syncope

|         |   |    |        |    |   |
|---------|---|----|--------|----|---|
| Rating  | 1 | 2  | 3      | 4  | 5 |
| %       | 4 | 22 | 35     | 39 |   |
| Median: | 3 |    | IQR: 2 |    |   |

Q67. Balloon-pump insertion

|         |    |    |        |    |   |
|---------|----|----|--------|----|---|
| Rating  | 1  | 2  | 3      | 4  | 5 |
| %       | 17 | 30 | 30     | 17 | 4 |
| Median: | 3  |    | IQR: 1 |    |   |

Q68. Heart transplant

|         |    |    |        |    |   |
|---------|----|----|--------|----|---|
| Rating  | 1  | 2  | 3      | 4  | 5 |
| %       | 13 | 30 | 35     | 13 | 9 |
| Median: | 3  |    | IQR: 1 |    |   |

Q69. Initiation of anti-arrhythmia medical therapy

|         |    |    |      |    |   |
|---------|----|----|------|----|---|
| Rating  | 1  | 2  | 3    | 4  | 5 |
| %       | 22 | 30 | 30   | 17 |   |
| Median: | 2  |    | IQR: |    | 1 |

Q70. Ventricular assist device

|         |    |    |      |    |   |
|---------|----|----|------|----|---|
| Rating  | 1  | 2  | 3    | 4  | 5 |
| %       | 26 | 22 | 35   | 13 | 4 |
| Median: | 3  |    | IQR: |    | 2 |

Q71. Endoscopic/ surgical treatment of esophageal varices

|         |   |    |      |    |   |
|---------|---|----|------|----|---|
| Rating  | 1 | 2  | 3    | 4  | 5 |
| %       | 9 | 26 | 39   | 17 | 9 |
| Median: | 3 |    | IQR: |    | 2 |

Q72. Endoscopic/ surgical treatment of gastric/ duodenal ulcerations

|         |   |    |      |    |   |
|---------|---|----|------|----|---|
| Rating  | 1 | 2  | 3    | 4  | 5 |
| %       | 9 | 26 | 39   | 17 | 9 |
| Median: | 3 |    | IQR: |    | 2 |

Q73. Dialysis for electrolyte abnormalities

|         |    |    |      |    |   |
|---------|----|----|------|----|---|
| Rating  | 1  | 2  | 3    | 4  | 5 |
| %       | 13 | 13 | 48   | 17 | 9 |
| Median: | 3  |    | IQR: |    | 2 |

Q74. Use of vasopressors

|         |   |    |      |    |   |
|---------|---|----|------|----|---|
| Rating  | 1 | 2  | 3    | 4  | 5 |
| %       | 4 | 39 | 35   | 17 | 4 |
| Median: | 3 |    | IQR: |    | 1 |

Q75. Cardiopulmonary resuscitation

|         |    |   |      |    |   |
|---------|----|---|------|----|---|
| Rating  | 1  | 2 | 3    | 4  | 5 |
| %       | 65 | 9 | 13   | 13 |   |
| Median: | 1  |   | IQR: |    | 2 |

Q76. Admission to the intensive care unit

|        |    |    |    |    |   |
|--------|----|----|----|----|---|
| Rating | 1  | 2  | 3  | 4  | 5 |
| %      | 26 | 30 | 22 | 17 | 4 |

Median: 2 IQR: 2

Health Services Use:

Q77. Return visit for syncope/fall resulting in admission, but without any of the above events

|        |    |    |    |    |   |
|--------|----|----|----|----|---|
| Rating | 1  | 2  | 3  | 4  | 5 |
| %      | 35 | 26 | 26 | 13 |   |

Median: 2 IQR: 2

**ECG Abnormalities (Q78-Q95)**

1- Strongly agree; 2- Agree; 3-Don't know/ depends; 4- Disagree; 5- Strongly disagree  
 Your individual response is in RED.

Items achieving >80% consensus (Rating=1,2) are in **BOLD**

Items achieving 70-80% consensus (Rating=1,2) are in *ITALICS*

ECG Abnormalities:

The following ECG findings should be considered abnormal:

**Q78. Non-sinus rhythms (includes paced rhythm)**

|         |          |    |        |   |   |
|---------|----------|----|--------|---|---|
| Rating  | <b>1</b> | 2  | 3      | 4 | 5 |
| %       | 39       | 48 | 9      | 4 |   |
| Median: | 2        |    | IQR: 1 |   |   |

Q79. Frequent PVCs (>3 on standard 10 second tracing)

|         |          |    |        |    |   |
|---------|----------|----|--------|----|---|
| Rating  | <b>1</b> | 2  | 3      | 4  | 5 |
| %       | 30       | 30 | 22     | 17 |   |
| Median: | 2        |    | IQR: 2 |    |   |

**Q80. Sinus bradycardia ≤ 40**

|         |          |    |        |   |   |
|---------|----------|----|--------|---|---|
| Rating  | <b>1</b> | 2  | 3      | 4 | 5 |
| %       | 48       | 43 | 9      |   |   |
| Median: | 2        |    | IQR: 2 |   |   |

Q81. Left ventricular hypertrophy

|         |    |    |          |    |   |
|---------|----|----|----------|----|---|
| Rating  | 1  | 2  | <b>3</b> | 4  | 5 |
| %       | 17 | 39 | 26       | 17 |   |
| Median: | 2  |    | IQR: 1   |    |   |

Q82. Right ventricular hypertrophy

|         |    |    |        |          |   |
|---------|----|----|--------|----------|---|
| Rating  | 1  | 2  | 3      | <b>4</b> | 5 |
| %       | 17 | 35 | 26     | 22       |   |
| Median: | 2  |    | IQR: 1 |          |   |

Q83. Left axis deviation

|         |   |    |      |    |   |
|---------|---|----|------|----|---|
| Rating  | 1 | 2  | 3    | 4  | 5 |
| %       | 4 | 17 | 48   | 30 |   |
| Median: | 3 |    | IQR: |    | 1 |

Q84. Right axis deviation

|         |   |   |      |    |   |
|---------|---|---|------|----|---|
| Rating  | 1 | 2 | 3    | 4  | 5 |
| %       | 9 | 4 | 52   | 35 |   |
| Median: | 3 |   | IQR: |    | 1 |

**Q85. Complete left bundle branch block**

|         |    |    |      |   |   |
|---------|----|----|------|---|---|
| Rating  | 1  | 2  | 3    | 4 | 5 |
| %       | 35 | 61 | 4    |   |   |
| Median: | 2  |    | IQR: |   | 1 |

Q86. Complete right bundle branch block

|         |   |    |      |    |   |
|---------|---|----|------|----|---|
| Rating  | 1 | 2  | 3    | 4  | 5 |
| %       | 4 | 39 | 43   | 13 |   |
| Median: | 3 |    | IQR: |    | 1 |

Q87. First degree block (>200 ms)

|         |   |    |      |    |   |
|---------|---|----|------|----|---|
| Rating  | 1 | 2  | 3    | 4  | 5 |
| %       |   | 39 | 30   | 26 | 4 |
| Median: | 3 |    | IQR: |    | 2 |

Q88. Short PR interval (<10 ms)

|         |   |    |      |    |   |
|---------|---|----|------|----|---|
| Rating  | 1 | 2  | 3    | 4  | 5 |
| %       | 9 | 43 | 35   | 13 |   |
| Median: | 2 |    | IQR: |    | 1 |

**Q89. Delta waves (e.g. Wolff-Parkinson-White)**

|         |    |    |      |   |   |
|---------|----|----|------|---|---|
| Rating  | 1  | 2  | 3    | 4 | 5 |
| %       | 30 | 57 | 13   |   |   |
| Median: | 2  |    | IQR: |   | 1 |



**Q90. Prolonged QRS (>100 ms)**

|         |    |    |      |   |   |
|---------|----|----|------|---|---|
| Rating  | 1  | 2  | 3    | 4 | 5 |
| %       | 22 | 48 | 26   | 4 |   |
| Median: | 2  |    | IQR: |   | 1 |

**Q91. Prolonged QTc (>450 ms)**

|         |    |    |      |   |   |
|---------|----|----|------|---|---|
| Rating  | 1  | 2  | 3    | 4 | 5 |
| %       | 52 | 39 | 9    |   |   |
| Median: | 1  |    | IQR: |   | 1 |

**Q92. Brugada pattern**

|         |    |    |      |   |   |
|---------|----|----|------|---|---|
| Rating  | 1  | 2  | 3    | 4 | 5 |
| %       | 48 | 43 | 9    |   |   |
| Median: | 2  |    | IQR: |   | 1 |

**Q93. Q/ST/T changes consistent with acute or chronic ischemia**

|         |    |    |      |   |   |
|---------|----|----|------|---|---|
| Rating  | 1  | 2  | 3    | 4 | 5 |
| %       | 30 | 61 | 4    | 4 |   |
| Median: | 2  |    | IQR: |   | 1 |

**Q94. Non-specific ST/ T changes**

|         |   |   |      |    |   |
|---------|---|---|------|----|---|
| Rating  | 1 | 2 | 3    | 4  | 5 |
| %       |   | 9 | 43   | 43 | 4 |
| Median: | 3 |   | IQR: |    | 1 |

ECG Interpretation:

**Q95. Report who is interpreting the ECG (e.g. ED physician, cardiology overread, research team, etc)**

|         |    |    |      |   |   |
|---------|----|----|------|---|---|
| Rating  | 1  | 2  | 3    | 4 | 5 |
| %       | 43 | 52 | 4    |   |   |
| Median: | 2  |    | IQR: |   | 1 |
