# Supplementary material
Source: PubMed Central journal article supplement (PMC3376009)
Supplement: NIHMS368599-supplement-Supp_data_S4.pdf [file NIHMS368599-supplement-Supp_data_S4.pdf]

**Data Supplement S4. Results of Second Round Survey**

**Definition of Syncope (Q1-Q12)**

1- Strongly agree; 2- Agree; 3-Don't know/ depends; 4- Disagree; 5- Strongly disagree

Items achieving >80% consensus (Rating=1,2) are in **BOLD**

Items achieving 70-80% consensus (Rating=1,2) are in *ITALICS*

The following components should be included in the definition of syncope for ED based studies:

*Q2. Sudden*

|        |    |    |   |    |   |
|--------|----|----|---|----|---|
| Rating | 1  | 2  | 3 | 4  | 5 |
| %      | 48 | 30 | 4 | 17 |   |

Median: 2 IQR: 1

**Q3. Inability to maintain postural tone**

|        |    |    |   |   |   |
|--------|----|----|---|---|---|
| Rating | 1  | 2  | 3 | 4 | 5 |
| %      | 35 | 48 | 9 | 9 |   |

Median: 2 IQR: 1

**Q4. Immediate recovery**

|        |    |    |   |    |   |
|--------|----|----|---|----|---|
| Rating | 1  | 2  | 3 | 4  | 5 |
| %      | 39 | 43 | 4 | 13 |   |

Median: 2 IQR: 1

*Q7. Due to transient global hypoperfusion*

|        |    |    |    |   |   |
|--------|----|----|----|---|---|
| Rating | 1  | 2  | 3  | 4 | 5 |
| %      | 43 | 35 | 13 | 9 |   |

Median: 2 IQR: 1

The following patients should be excluded from syncope risk stratification studies:

**Q11. Head trauma followed by LOC**

|        |    |   |   |    |   |
|--------|----|---|---|----|---|
| Rating | 1  | 2 | 3 | 4  | 5 |
| %      | 74 | 9 | 4 | 13 |   |

Median: 1 IQR: 1

**Relevant Outcome Timeframe for ED Decision-Making (Q13-Q17)**

1- Strongly agree; 2- Agree; 3-Don't know/ depends; 4- Disagree; 5- Strongly disagree

Items achieving >80% consensus (Rating=1,2) are in **BOLD**

Items achieving 70-80% consensus (Rating=1,2) are in *ITALICS*

An ED-based risk stratification tool should:

**Q13. Identify serious outcomes that are recognized during the ED evaluation**

|        |    |    |   |   |   |
|--------|----|----|---|---|---|
| Rating | 1  | 2  | 3 | 4 | 5 |
| %      | 52 | 30 | 4 | 9 | 4 |

Median: 1 IQR: 1

Q16. Identify serious outcomes occurring between 31-180 days after the ED visit

|        |   |    |    |    |   |
|--------|---|----|----|----|---|
| Rating | 1 | 2  | 3  | 4  | 5 |
| %      | 9 | 39 | 22 | 26 | 4 |

Median: 3 IQR: 2

Q17. Identify serious outcomes occurring between 181-365 days after the ED visit

|        |   |    |    |    |   |
|--------|---|----|----|----|---|
| Rating | 1 | 2  | 3  | 4  | 5 |
| %      | 9 | 23 | 23 | 36 | 9 |

Median: 3 IQR: 2

**Relevant Outcomes for ED Decision-making (Q18-Q35)**

1- Strongly agree; 2- Agree; 3-Don't know/ depends; 4- Disagree; 5- Strongly disagree

Items achieving >80% consensus (Rating=1,2) are in **BOLD**

Items achieving 70-80% consensus (Rating=1,2) are in *ITALICS*

Explicit risk prediction for serious outcomes may improve clinical decision-making. Clinically important outcomes that should be predicted by a risk stratification tool include:

Mortality:

Q18. All-cause death

|        |    |    |    |    |   |
|--------|----|----|----|----|---|
| Rating | 1  | 2  | 3  | 4  | 5 |
| %      | 39 | 22 | 22 | 13 | 4 |

Median: 2 IQR: 2

**Q20. Syncope-related death**

|        |    |    |   |   |   |
|--------|----|----|---|---|---|
| Rating | 1  | 2  | 3 | 4 | 5 |
| %      | 57 | 26 | 4 | 9 | 4 |

Median: 1 IQR: 1

Arrhythmias:

**Q24. Non-symptomatic ventricular tachycardia < 30 seconds**

|        |    |    |    |    |   |
|--------|----|----|----|----|---|
| Rating | 1  | 2  | 3  | 4  | 5 |
| %      | 14 | 50 | 23 | 14 |   |

Median: 2 IQR: 1

**Q25. Symptomatic sinus bradycardia < 60 beats/minute**

|        |    |    |    |    |   |
|--------|----|----|----|----|---|
| Rating | 1  | 2  | 3  | 4  | 5 |
| %      | 13 | 39 | 30 | 17 |   |

Median: 2 IQR: 1

**Q26. Sinus bradycardia < 40 beats/minute**

|        |    |    |    |   |   |
|--------|----|----|----|---|---|
| Rating | 1  | 2  | 3  | 4 | 5 |
| %      | 43 | 26 | 22 | 9 |   |

Median: 2 IQR: 2

**Q27. Sick sinus syndrome with alternating sinus bradycardia and tachycardia**

|        |    |    |    |   |   |
|--------|----|----|----|---|---|
| Rating | 1  | 2  | 3  | 4 | 5 |
| %      | 41 | 41 | 14 | 5 |   |

Median: 2 IQR: 1

**Q28. Sinus pause > 3 seconds**

|        |    |    |    |   |   |
|--------|----|----|----|---|---|
| Rating | 1  | 2  | 3  | 4 | 5 |
| %      | 59 | 23 | 14 | 5 |   |

Median: 1 IQR: 1

**Q29. Symptomatic Mobitz type I atrioventricular heart block**

|        |    |    |    |    |    |
|--------|----|----|----|----|----|
| Rating | 1  | 2  | 3  | 4  | 5  |
| %      | 14 | 38 | 29 | 10 | 10 |

Median: 2 IQR: 1

Q32. Junctional/idioventricular rhythm

|         |    |    |      |    |   |
|---------|----|----|------|----|---|
| Rating  | 1  | 2  | 3    | 4  | 5 |
| %       | 27 | 32 | 23   | 18 |   |
| Median: | 2  |    | IQR: | 2  |   |

Q33. Symptomatic supraventricular tachycardia with ventricular rate > 100/minute

|         |    |    |      |   |   |
|---------|----|----|------|---|---|
| Rating  | 1  | 2  | 3    | 4 | 5 |
| %       | 23 | 41 | 27   | 9 |   |
| Median: | 2  |    | IQR: | 1 |   |

Q34. Symptomatic atrial flutter/fibrillation with ventricular rate <60/min

|         |    |    |      |   |   |
|---------|----|----|------|---|---|
| Rating  | 1  | 2  | 3    | 4 | 5 |
| %       | 32 | 41 | 27   |   |   |
| Median: | 2  |    | IQR: | 2 |   |

**Q35. Pacemaker or implantable cardioverter-defibrillator malfunction with cardiac pauses.**

|         |    |    |      |   |   |
|---------|----|----|------|---|---|
| Rating  | 1  | 2  | 3    | 4 | 5 |
| %       | 70 | 22 | 9    |   |   |
| Median: | 1  |    | IQR: | 1 |   |

Electrophysiology Study Findings:

Q36. Corrected sinus node recovery time > 550 milliseconds

|         |    |    |      |    |   |
|---------|----|----|------|----|---|
| Rating  | 1  | 2  | 3    | 4  | 5 |
| %       | 14 | 32 | 32   | 23 |   |
| Median: | 3  |    | IQR: | 1  |   |

Q37. His-ventricular intervals >100 milliseconds

|         |    |    |      |   |   |
|---------|----|----|------|---|---|
| Rating  | 1  | 2  | 3    | 4 | 5 |
| %       | 27 | 36 | 32   | 5 |   |
| Median: | 2  |    | IQR: | 2 |   |

Q38. Inducible ventricular tachycardia for > 30 seconds

|         |    |    |      |   |   |
|---------|----|----|------|---|---|
| Rating  | 1  | 2  | 3    | 4 | 5 |
| %       | 39 | 30 | 26   | 4 |   |
| Median: | 2  |    | IQR: | 2 |   |

Q39. Inducible polymorphic ventricular tachycardia or ventricular fibrillation in patients with Brugada

|        |    |    |    |   |   |
|--------|----|----|----|---|---|
| Rating | 1  | 2  | 3  | 4 | 5 |
| %      | 41 | 27 | 18 | 9 | 5 |

Median: 2 IQR: 2

Q40. Inducible polymorphic ventricular tachycardia or ventricular fibrillation in patients with ventricular dysplasia

|        |    |    |    |   |   |
|--------|----|----|----|---|---|
| Rating | 1  | 2  | 3  | 4 | 5 |
| %      | 36 | 27 | 27 | 9 |   |

Median: 2 IQR: 2

Q41. Inducible polymorphic ventricular tachycardia or ventricular fibrillation in patients with previous cardiac arrest

|        |    |    |    |    |   |
|--------|----|----|----|----|---|
| Rating | 1  | 2  | 3  | 4  | 5 |
| %      | 45 | 23 | 18 | 14 |   |

Median: 2 IQR: 2

Q42. Infra-Hisian block

|        |    |    |    |   |   |
|--------|----|----|----|---|---|
| Rating | 1  | 2  | 3  | 4 | 5 |
| %      | 41 | 27 | 27 | 5 |   |

Median: 2 IQR: 2

Structural Heart Disease:

**Q43. Aortic stenosis with valve area  $\leq 1\text{cm}^2$**

|        |    |    |   |   |   |
|--------|----|----|---|---|---|
| Rating | 1  | 2  | 3 | 4 | 5 |
| %      | 64 | 27 | 9 |   |   |

Median: 1 IQR: 1

**Q44. Hypertrophic cardiomyopathy with outflow tract obstruction**

|        |    |    |   |   |   |
|--------|----|----|---|---|---|
| Rating | 1  | 2  | 3 | 4 | 5 |
| %      | 61 | 30 | 9 |   |   |

Median: 1 IQR: 1

Q45. Hypertrophic cardiomyopathy without outflow tract obstruction

|         |    |    |      |   |   |
|---------|----|----|------|---|---|
| Rating  | 1  | 2  | 3    | 4 | 5 |
| %       | 18 | 41 | 32   | 9 |   |
| Median: | 2  |    | IQR: | 1 |   |

Q47. Pericardial effusion with effect on ventricular wall motion or pericardial tamponade

|         |    |    |      |   |   |
|---------|----|----|------|---|---|
| Rating  | 1  | 2  | 3    | 4 | 5 |
| %       | 55 | 23 | 14   | 9 |   |
| Median: | 1  |    | IQR: | 1 |   |

Q48. Pulmonary hypertension with a mean arterial pressure > 30 mmHg

|         |     |    |      |    |   |
|---------|-----|----|------|----|---|
| Rating  | 1   | 2  | 3    | 4  | 5 |
| %       | 18  | 32 | 27   | 23 |   |
| Median: | 2.5 |    | IQR: | 1  |   |

Q49. Mitral stenosis with valve area  $\leq 2$  cm<sup>2</sup>

|         |    |    |      |   |   |
|---------|----|----|------|---|---|
| Rating  | 1  | 2  | 3    | 4 | 5 |
| %       | 41 | 27 | 23   | 9 |   |
| Median: | 2  |    | IQR: | 2 |   |

50. Left ventricular ejection fraction <40%

|         |    |    |      |   |   |
|---------|----|----|------|---|---|
| Rating  | 1  | 2  | 3    | 4 | 5 |
| %       | 35 | 43 | 17   | 4 |   |
| Median: | 2  |    | IQR: | 1 |   |

Non-cardiac outcomes:

Q52. Cortical stroke

|         |    |    |      |    |    |
|---------|----|----|------|----|----|
| Rating  | 1  | 2  | 3    | 4  | 5  |
| %       | 13 | 17 | 13   | 43 | 13 |
| Median: | 4  |    | IQR: | 2  |    |

Q53. Vertebrobasilar stroke

|         |    |    |      |    |    |
|---------|----|----|------|----|----|
| Rating  | 1  | 2  | 3    | 4  | 5  |
| %       | 13 | 30 | 17   | 26 | 13 |
| Median: | 3  |    | IQR: | 2  |    |

Q57. Ectopic pregnancy

|        |    |    |    |    |   |
|--------|----|----|----|----|---|
| Rating | 1  | 2  | 3  | 4  | 5 |
| %      | 17 | 22 | 35 | 17 | 9 |

Median: 3 IQR: 2

Q58. Abdominal aortic aneurysm

|        |    |    |    |    |   |
|--------|----|----|----|----|---|
| Rating | 1  | 2  | 3  | 4  | 5 |
| %      | 23 | 27 | 18 | 23 | 9 |

Median: 2.5 IQR: 2

Q59. Subarachnoid hemorrhage

|        |    |    |    |    |   |
|--------|----|----|----|----|---|
| Rating | 1  | 2  | 3  | 4  | 5 |
| %      | 26 | 26 | 22 | 22 | 4 |

Median: 2 IQR: 3

Q60. Pneumothorax or pleural effusion

|        |   |    |    |    |    |
|--------|---|----|----|----|----|
| Rating | 1 | 2  | 3  | 4  | 5  |
| %      | 9 | 30 | 26 | 22 | 13 |

Median: 3 IQR: 2

Q61. Sepsis

|        |    |    |    |    |    |
|--------|----|----|----|----|----|
| Rating | 1  | 2  | 3  | 4  | 5  |
| %      | 17 | 35 | 13 | 22 | 13 |

Median: 2 IQR: 2

Medical/ Procedural Interventions:

Q64. Coronary artery bypass graft or coronary artery stent

|        |    |    |    |   |    |
|--------|----|----|----|---|----|
| Rating | 1  | 2  | 3  | 4 | 5  |
| %      | 17 | 48 | 26 | 9 | 13 |

Median: 2 IQR: 1

Q65. Cardiac valve surgery

|        |    |    |    |   |   |
|--------|----|----|----|---|---|
| Rating | 1  | 2  | 3  | 4 | 5 |
| %      | 30 | 35 | 22 | 9 | 4 |

Median: 2 IQR: 2

Q66. Elective cardioversion in the absence of objective evidence that tachyarrhythmia is responsible for the syncope

|         |    |    |      |    |    |
|---------|----|----|------|----|----|
| Rating  | 1  | 2  | 3    | 4  | 5  |
| %       | 14 | 23 | 18   | 32 | 14 |
| Median: | 3  |    | IQR: |    | 2  |

Q67. Balloon-pump insertion

|         |    |    |      |    |   |
|---------|----|----|------|----|---|
| Rating  | 1  | 2  | 3    | 4  | 5 |
| %       | 17 | 30 | 30   | 13 | 9 |
| Median: | 3  |    | IQR: |    | 1 |

Q68. Heart transplant

|         |    |    |      |    |   |
|---------|----|----|------|----|---|
| Rating  | 1  | 2  | 3    | 4  | 5 |
| %       | 14 | 18 | 41   | 18 | 9 |
| Median: | 3  |    | IQR: |    | 2 |

Q69. Initiation of anti-arrhythmia medical therapy

|         |    |    |      |   |   |
|---------|----|----|------|---|---|
| Rating  | 1  | 2  | 3    | 4 | 5 |
| %       | 14 | 41 | 32   | 9 | 5 |
| Median: | 2  |    | IQR: |   | 1 |

Q70. Ventricular assist device

|         |    |    |      |   |    |
|---------|----|----|------|---|----|
| Rating  | 1  | 2  | 3    | 4 | 5  |
| %       | 23 | 27 | 27   | 9 | 14 |
| Median: | 2  |    | IQR: |   | 1  |

Q71. Endoscopic/ surgical treatment of esophageal varices

|         |     |    |      |    |    |
|---------|-----|----|------|----|----|
| Rating  | 1   | 2  | 3    | 4  | 5  |
| %       | 23  | 27 | 18   | 18 | 14 |
| Median: | 2.5 |    | IQR: |    | 2  |

Q72. Endoscopic/ surgical treatment of gastric/ duodenal ulcerations

|         |     |    |      |    |    |
|---------|-----|----|------|----|----|
| Rating  | 1   | 2  | 3    | 4  | 5  |
| %       | 23  | 27 | 18   | 18 | 14 |
| Median: | 2.5 |    | IQR: |    | 2  |



Q73. Dialysis for electrolyte abnormalities

|         |   |    |      |    |   |
|---------|---|----|------|----|---|
| Rating  | 1 | 2  | 3    | 4  | 5 |
| %       | 9 | 23 | 27   | 32 | 9 |
| Median: | 3 |    | IQR: |    | 2 |

Q74. Use of vasopressors

|         |    |    |      |    |    |
|---------|----|----|------|----|----|
| Rating  | 1  | 2  | 3    | 4  | 5  |
| %       | 19 | 38 | 14   | 19 | 10 |
| Median: | 2  |    | IQR: |    | 2  |

**Q75. Cardiopulmonary resuscitation**

|         |    |    |      |   |   |
|---------|----|----|------|---|---|
| Rating  | 1  | 2  | 3    | 4 | 5 |
| %       | 55 | 41 | 5    |   |   |
| Median: | 1  |    | IQR: |   | 1 |

Q76. Admission to the intensive care unit

|         |    |    |      |    |   |
|---------|----|----|------|----|---|
| Rating  | 1  | 2  | 3    | 4  | 5 |
| %       | 27 | 27 | 14   | 23 | 9 |
| Median: | 2  |    | IQR: |    | 3 |

Health Services Use:

Q77. Return visit for syncope/fall resulting in admission, but without any of the above events

|         |    |    |      |   |   |
|---------|----|----|------|---|---|
| Rating  | 1  | 2  | 3    | 4 | 5 |
| %       | 39 | 30 | 22   | 9 |   |
| Median: | 2  |    | IQR: |   | 2 |

**ECG Abnormalities (Q78-Q95)**

1- Strongly agree; 2- Agree; 3-Don't know/ depends; 4- Disagree; 5- Strongly disagree  
 Items achieving >80% consensus (Rating=1,2) are in **BOLD**  
 Items achieving 70-80% consensus (Rating=1,2) are in *ITALICS*

ECG Abnormalities:

The following ECG findings should be considered abnormal:

Q79. Frequent PVCs (>3 on standard 10 second tracing)

|         |    |    |      |    |   |
|---------|----|----|------|----|---|
| Rating  | 1  | 2  | 3    | 4  | 5 |
| %       | 26 | 30 | 26   | 17 |   |
| Median: | 2  |    | IQR: | 2  |   |

Q81. Left ventricular hypertrophy

|         |    |    |      |    |   |
|---------|----|----|------|----|---|
| Rating  | 1  | 2  | 3    | 4  | 5 |
| %       | 17 | 30 | 26   | 26 |   |
| Median: | 3  |    | IQR: | 2  |   |

Q82. Right ventricular hypertrophy

|         |    |    |      |    |   |
|---------|----|----|------|----|---|
| Rating  | 1  | 2  | 3    | 4  | 5 |
| %       | 13 | 35 | 22   | 30 |   |
| Median: | 3  |    | IQR: | 2  |   |

Q83. Left axis deviation

|         |   |    |      |    |   |
|---------|---|----|------|----|---|
| Rating  | 1 | 2  | 3    | 4  | 5 |
| %       | 4 | 17 | 43   | 35 |   |
| Median: | 3 |    | IQR: | 1  |   |

Q84. Right axis deviation

|         |   |    |      |    |   |
|---------|---|----|------|----|---|
| Rating  | 1 | 2  | 3    | 4  | 5 |
| %       | 3 | 26 | 35   | 35 |   |
| Median: | 3 |    | IQR: | 2  |   |

Q86. Complete right bundle branch block

|         |    |    |      |    |   |
|---------|----|----|------|----|---|
| Rating  | 1  | 2  | 3    | 4  | 5 |
| %       | 17 | 30 | 26   | 26 |   |
| Median: | 3  |    | IQR: | 2  |   |

Q87. First degree block (>200 ms)

|         |   |    |      |    |   |
|---------|---|----|------|----|---|
| Rating  | 1 | 2  | 3    | 4  | 5 |
| %       | 9 | 26 | 22   | 43 |   |
| Median: | 3 |    | IQR: | 2  |   |

Q88. Short PR interval (<10 ms)

|         |   |    |      |    |   |
|---------|---|----|------|----|---|
| Rating  | 1 | 2  | 3    | 4  | 5 |
| %       | 9 | 43 | 26   | 17 | 4 |
| Median: | 2 |    | IQR: | 1  |   |

**Q90. Prolonged QRS (>100 ms)**

|         |    |    |      |   |   |
|---------|----|----|------|---|---|
| Rating  | 1  | 2  | 3    | 4 | 5 |
| %       | 32 | 55 | 5    | 5 | 5 |
| Median: | 2  |    | IQR: | 1 |   |

Q94. Non-specific ST/T changes

|         |   |    |      |    |   |
|---------|---|----|------|----|---|
| Rating  | 1 | 2  | 3    | 4  | 5 |
| %       | 4 | 13 | 22   | 57 | 4 |
| Median: | 4 |    | IQR: | 1  |   |

**Candidate Predictors (Q96-Q130)**

1- Strongly agree; 2- Agree; 3-Don't know/ depends; 4- Disagree; 5- Strongly disagree

Items achieving >80% consensus (Rating=1,2) are in **BOLD**

Items achieving 70-80% consensus (Rating=1,2) are in *ITALICS*

Data on the following elements should be collected and reported:

Demographic characteristics:

Q98. Race and ethnicity (self reported)

|         |    |    |      |    |   |
|---------|----|----|------|----|---|
| Rating  | 1  | 2  | 3    | 4  | 5 |
| %       | 14 | 45 | 18   | 18 | 5 |
| Median: | 2  |    | IQR: | 1  |   |

Q99. Insurance status

|         |   |    |        |    |    |
|---------|---|----|--------|----|----|
| Rating  | 1 | 2  | 3      | 4  | 5  |
| %       | 4 | 17 | 26     | 30 | 22 |
| Median: | 4 |    | IQR: 1 |    |    |

Q100. Mode of arrival (self transport, ambulance, transfer from another facility)

|         |    |    |        |    |    |
|---------|----|----|--------|----|----|
| Rating  | 1  | 2  | 3      | 4  | 5  |
| %       | 13 | 30 | 22     | 22 | 13 |
| Median: | 3  |    | IQR: 2 |    |    |

Q101. Body mass index

|         |    |    |        |    |   |
|---------|----|----|--------|----|---|
| Rating  | 1  | 2  | 3      | 4  | 5 |
| %       | 14 | 23 | 32     | 23 | 9 |
| Median: | 3  |    | IQR: 2 |    |   |

Historical features:

Q104. While working

|         |    |    |        |    |   |
|---------|----|----|--------|----|---|
| Rating  | 1  | 2  | 3      | 4  | 5 |
| %       | 35 | 26 | 17     | 17 | 4 |
| Median: | 2  |    | IQR: 2 |    |   |

Q113. Vertigo

|         |    |    |        |   |    |
|---------|----|----|--------|---|----|
| Rating  | 1  | 2  | 3      | 4 | 5  |
| %       | 23 | 23 | 36     | 5 | 14 |
| Median: | 3  |    | IQR: 1 |   |    |

Q114. Headache

|         |    |    |        |   |    |
|---------|----|----|--------|---|----|
| Rating  | 1  | 2  | 3      | 4 | 5  |
| %       | 26 | 26 | 26     | 9 | 13 |
| Median: | 2  |    | IQR: 2 |   |    |

Q115. Incontinence of urine or stool

|         |    |    |        |   |   |
|---------|----|----|--------|---|---|
| Rating  | 1  | 2  | 3      | 4 | 5 |
| %       | 26 | 52 | 9      | 9 | 4 |
| Median: | 2  |    | IQR: 1 |   |   |

**Q116. Lightheadedness**

|         |    |    |      |   |   |
|---------|----|----|------|---|---|
| Rating  | 1  | 2  | 3    | 4 | 5 |
| %       | 45 | 36 | 14   | 5 |   |
| Median: | 2  |    | IQR: | 1 |   |

**Q118. Post-prandial (within 1 hour of meal)**

|         |    |    |      |   |   |
|---------|----|----|------|---|---|
| Rating  | 1  | 2  | 3    | 4 | 5 |
| %       | 39 | 48 | 9    | 4 |   |
| Median: | 2  |    | IQR: | 1 |   |

*Q120. Abdominal pain*

|         |    |    |      |   |   |
|---------|----|----|------|---|---|
| Rating  | 1  | 2  | 3    | 4 | 5 |
| %       | 26 | 52 | 17   |   | 4 |
| Median: | 2  |    | IQR: | 1 |   |

*Q122. Feeling of cold*

|         |   |    |      |    |   |
|---------|---|----|------|----|---|
| Rating  | 1 | 2  | 3    | 4  | 5 |
| %       | 9 | 39 | 30   | 13 | 9 |
| Median: | 3 |    | IQR: | 1  |   |

*Q124. Cyanosis noted by bystander*

|         |    |    |      |    |   |
|---------|----|----|------|----|---|
| Rating  | 1  | 2  | 3    | 4  | 5 |
| %       | 41 | 32 | 14   | 14 |   |
| Median: | 2  |    | IQR: | 2  |   |

**Q125. Blurred vision**

|         |    |    |      |   |   |
|---------|----|----|------|---|---|
| Rating  | 1  | 2  | 3    | 4 | 5 |
| %       | 22 | 61 | 9    | 9 |   |
| Median: | 2  |    | IQR: | 0 |   |

**Q126. Any prodromes lasting greater than 5 seconds**

|         |    |    |      |   |   |
|---------|----|----|------|---|---|
| Rating  | 1  | 2  | 3    | 4 | 5 |
| %       | 35 | 57 | 4    | 4 |   |
| Median: | 2  |    | IQR: | 1 |   |

Q129. Recent history of diarrhea

|         |    |    |      |    |   |
|---------|----|----|------|----|---|
| Rating  | 1  | 2  | 3    | 4  | 5 |
| %       | 22 | 43 | 13   | 22 |   |
| Median: | 2  |    | IQR: | 1  |   |

Q130. Recent history of decreased oral intake

|         |    |    |      |    |   |
|---------|----|----|------|----|---|
| Rating  | 1  | 2  | 3    | 4  | 5 |
| %       | 13 | 30 | 35   | 22 |   |
| Median: | 3  |    | IQR: | 1  |   |

Co-morbidities:

Q134. Peripheral vascular disease

|         |   |    |      |    |   |
|---------|---|----|------|----|---|
| Rating  | 1 | 2  | 3    | 4  | 5 |
| %       | 4 | 26 | 22   | 48 |   |
| Median: | 3 |    | IQR: | 2  |   |

Q135. Stroke / TIA

|         |    |    |      |    |   |
|---------|----|----|------|----|---|
| Rating  | 1  | 2  | 3    | 4  | 5 |
| %       | 22 | 39 | 13   | 26 |   |
| Median: | 2  |    | IQR: | 2  |   |

**Q141. Structural heart disease- cardiac valve disease, excluding aortic stenosis and mitral prolapse**

|         |    |    |      |   |   |
|---------|----|----|------|---|---|
| Rating  | 1  | 2  | 3    | 4 | 5 |
| %       | 43 | 48 |      | 9 |   |
| Median: | 2  |    | IQR: | 1 |   |

*Q147. Diabetes requiring medication*

|         |    |    |      |    |   |
|---------|----|----|------|----|---|
| Rating  | 1  | 2  | 3    | 4  | 5 |
| %       | 17 | 57 | 13   | 13 |   |
| Median: | 2  |    | IQR: | 1  |   |

Q149. Renal insufficiency (creatinine >2 mg/dL in the ED)

|         |    |    |      |    |   |
|---------|----|----|------|----|---|
| Rating  | 1  | 2  | 3    | 4  | 5 |
| %       | 13 | 43 | 26   | 17 |   |
| Median: | 2  |    | IQR: | 1  |   |

Q151. First syncope episode prior to age 35

|        |    |    |    |    |   |
|--------|----|----|----|----|---|
| Rating | 1  | 2  | 3  | 4  | 5 |
| %      | 30 | 39 | 13 | 22 |   |

Median: 2 IQR: 2

Q152. Prior gastrointestinal bleeding

|        |    |    |    |    |   |
|--------|----|----|----|----|---|
| Rating | 1  | 2  | 3  | 4  | 5 |
| %      | 26 | 35 | 26 | 13 |   |

Median: 2 IQR: 2

Medications:

Q154. Digoxin

|        |    |    |    |    |   |
|--------|----|----|----|----|---|
| Rating | 1  | 2  | 3  | 4  | 5 |
| %      | 26 | 30 | 26 | 13 | 4 |

Median: 2 IQR: 2

Q155. Alpha-blocker (e.g. tamsulosin, terazosin)

|        |    |    |    |   |   |
|--------|----|----|----|---|---|
| Rating | 1  | 2  | 3  | 4 | 5 |
| %      | 48 | 30 | 13 | 4 | 4 |

Median: 2 IQR: 1

**Q156. Beta-blocker**

|        |    |    |   |   |   |
|--------|----|----|---|---|---|
| Rating | 1  | 2  | 3 | 4 | 5 |
| %      | 43 | 39 | 9 | 9 |   |

Median: 2 IQR: 1

Q157. Calcium channel blockers

|        |    |    |    |   |   |
|--------|----|----|----|---|---|
| Rating | 1  | 2  | 3  | 4 | 5 |
| %      | 22 | 48 | 22 | 4 | 4 |

Median: 2 IQR: 1

**Q158. Nitrates**

|        |    |    |    |   |   |
|--------|----|----|----|---|---|
| Rating | 1  | 2  | 3  | 4 | 5 |
| %      | 30 | 52 | 13 | 4 |   |

Median: 2 IQR: 1

Physical examination findings:

Q161. Highest systolic blood pressure measured in ED

|         |    |   |      |    |   |
|---------|----|---|------|----|---|
| Rating  | 1  | 2 | 3    | 4  | 5 |
| %       | 35 | 9 | 17   | 30 | 9 |
| Median: | 3  |   | IQR: |    | 3 |

Q164. Highest pulse measured in ED

|         |    |    |      |    |   |
|---------|----|----|------|----|---|
| Rating  | 1  | 2  | 3    | 4  | 5 |
| %       | 43 | 22 | 13   | 22 |   |
| Median: | 2  |    | IQR: |    | 2 |

Q167. Pulse oximetry on room air

|         |    |    |      |    |   |
|---------|----|----|------|----|---|
| Rating  | 1  | 2  | 3    | 4  | 5 |
| %       | 39 | 26 | 22   | 13 |   |
| Median: | 2  |    | IQR: |    | 2 |

**Q168. Heart murmur**

|         |    |    |      |   |   |
|---------|----|----|------|---|---|
| Rating  | 1  | 2  | 3    | 4 | 5 |
| %       | 39 | 43 | 9    | 9 |   |
| Median: | 2  |    | IQR: |   | 1 |

Q169. S3 or S4 gallop

|         |    |    |      |    |   |
|---------|----|----|------|----|---|
| Rating  | 1  | 2  | 3    | 4  | 5 |
| %       | 22 | 39 | 17   | 17 | 4 |
| Median: | 2  |    | IQR: |    | 1 |

Q170. Carotid bruit

|         |    |    |      |    |   |
|---------|----|----|------|----|---|
| Rating  | 1  | 2  | 3    | 4  | 5 |
| %       | 22 | 26 | 13   | 30 | 9 |
| Median: | 3  |    | IQR: |    | 2 |

Q172. Fecal occult blood

|         |    |    |      |    |   |
|---------|----|----|------|----|---|
| Rating  | 1  | 2  | 3    | 4  | 5 |
| %       | 22 | 26 | 26   | 26 |   |
| Median: | 3  |    | IQR: |    | 2 |



Q173. Dry mucous membranes

|        |   |    |    |    |   |
|--------|---|----|----|----|---|
| Rating | 1 | 2  | 3  | 4  | 5 |
| %      | 9 | 43 | 22 | 22 | 4 |

Median: 2 IQR: 2

Laboratory tests:

Q174. Blood urea nitrogen

|        |   |    |    |    |   |
|--------|---|----|----|----|---|
| Rating | 1 | 2  | 3  | 4  | 5 |
| %      | 9 | 35 | 26 | 30 |   |

Median: 3 IQR: 2

Q175. Creatinine

|        |    |    |    |    |   |
|--------|----|----|----|----|---|
| Rating | 1  | 2  | 3  | 4  | 5 |
| %      | 13 | 30 | 26 | 30 |   |

Median: 3 IQR: 2

Q176. Calculated creatinine clearance using Cockcroft-Gault formula:  $CrCl (mL/min) = \frac{[(140 - \text{age}) \times \text{weight (kg)}]}{72 \times \text{serum creatinine (mg/dL)}} \times 0.85$  for women)

|        |   |    |    |    |   |
|--------|---|----|----|----|---|
| Rating | 1 | 2  | 3  | 4  | 5 |
| %      | 9 | 22 | 13 | 57 |   |

Median: 4 IQR: 2

Q177. Glucose

|        |    |    |   |    |   |
|--------|----|----|---|----|---|
| Rating | 1  | 2  | 3 | 4  | 5 |
| %      | 17 | 52 | 9 | 22 |   |

Median: 2 IQR: 1

**Q178. Hematocrit and/or Hemoglobin**

|        |    |    |   |   |   |
|--------|----|----|---|---|---|
| Rating | 1  | 2  | 3 | 4 | 5 |
| %      | 43 | 48 | 9 |   |   |

Median: 2 IQR: 1

Q180. Initial troponin

|        |    |    |    |    |   |
|--------|----|----|----|----|---|
| Rating | 1  | 2  | 3  | 4  | 5 |
| %      | 17 | 30 | 35 | 17 |   |

Median: 3 IQR: 1

Q181. Serial troponin at least 4 hours after initial troponin

|        |   |    |    |    |   |
|--------|---|----|----|----|---|
| Rating | 1 | 2  | 3  | 4  | 5 |
| %      | 9 | 23 | 45 | 23 |   |

Median: 3 IQR: 1

Q182. Natriuretic peptide (BNP or NT-proBNP)

|        |   |    |    |    |   |
|--------|---|----|----|----|---|
| Rating | 1 | 2  | 3  | 4  | 5 |
| %      | 4 | 22 | 35 | 39 |   |

Median: 3 IQR: 2

Q183. Pregnancy test

|        |    |    |    |    |   |
|--------|----|----|----|----|---|
| Rating | 1  | 2  | 3  | 4  | 5 |
| %      | 18 | 14 | 32 | 36 |   |

Median: 3 IQR: 2
